# Supplementary material for: Sex as Biological Variable in Cardiac Mitochondrial Bioenergetic Responses to Acute Stress
Source: MDPI journal article supplement (doi:10.3390/ijms23169312), 2022-08-18
Supplement: s1 [file s1]

Archive with 1 entries (1 files):
- ijms-1829397-supplementary.pdf
